# Supplementary material for: Angiotensin Converting Enzyme Inhibitors May Increase While Active Vitamin D May Decrease the Risk of Severe Pneumonia in SARS-CoV-2 Infected Patients with Chronic Kidney Disease on Maintenance Hemodialysis
Source: MDPI journal article supplement (doi:10.3390/v14030451), 2022-02-22
Supplement: s1 [file s1]

**Table S1** Treatment and clinical course during hospitalization

| <b>Variable</b>                                                                                             | <b>ALL</b>   | <b>MILD<br/>CHANGES</b> | <b>SEVERE<br/>CHANGES</b> | <b><i>p value</i><br/>*</b> |
|-------------------------------------------------------------------------------------------------------------|--------------|-------------------------|---------------------------|-----------------------------|
| N                                                                                                           | 85           | 47                      | 38                        |                             |
| <b>Treatment</b> n (%)                                                                                      |              |                         |                           |                             |
| Remdesivir                                                                                                  | 5 (5.88)     | 1 (2.13)                | 4 (10.53)                 | 0.10                        |
| Convalescent plasma                                                                                         | 17 (20.0)    | 5 (10.64)               | 12 (31.58)                | 0.02                        |
| Corticosteroids                                                                                             | 47 (55.29)   | 20 (42.55)              | 27 (71.05)                | 0.008                       |
| Oxygen therapy                                                                                              | 60 (70.59)   | 24 (51.06)              | 36 (94.74)                | <0.001                      |
| < 15 l/min                                                                                                  | 48 (57.14)   | 21 (44.68)              | 27 (72.97)                | 0.01                        |
| >15 l /min                                                                                                  | 12 (14.29)   | 3 (6.38)                | 9 (24.32)                 | 0.02                        |
| Antibiotic treatment                                                                                        | 62 (73.81)   | 29 (63.04)              | 33 (86.84)                | 0.004                       |
| Red blood cells transfusion                                                                                 | 16 (18.82)   | 8 (17.02)               | 8 (21.05)                 | 0.59                        |
| LMWH                                                                                                        | 76 (89.41)   | 40 (85.11)              | 36 (94.74)                | 0.15                        |
| <b>Outcome</b>                                                                                              |              |                         |                           |                             |
| Death in hospital n (%)                                                                                     | 23 (27.06)   | 10 (21.28)              | 13 (34.21)                | 0.18                        |
| Day of death - median (IQR)                                                                                 | 10 (3-16)    | 15 (10-20)              | 4 (3-10)                  | 0.02                        |
| Days of hospitalization ** - mean (SD)                                                                      | 17.77 (7.37) | 15.92 (5.76)            | 20.52 (8.67)              | 0.01                        |
| Legend: LMWH, low molecular weight heparin. * - mild changes group vs. severe changes group. ** - survivals |              |                         |                           |                             |
